# Supplementary material for: Environmental Adaptation in the Process of Human-Land Relationship in Southeast China’s Ethnic Minority Areas and Its Significance on Sustainable Development
Source: MDPI journal article supplement (doi:10.3390/ijerph20032737), 2023-02-03
Supplement: s1 [file s1]

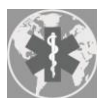

Supplementary Materials

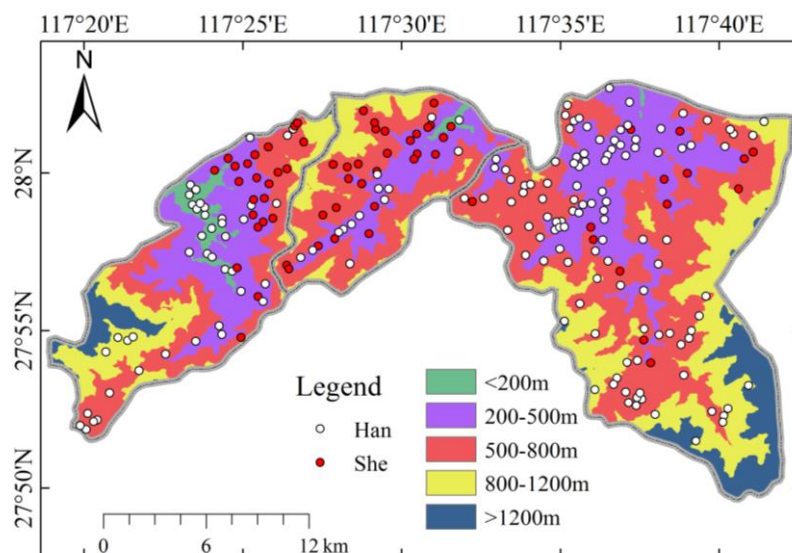

Figure S1. Human settlements in different elevations

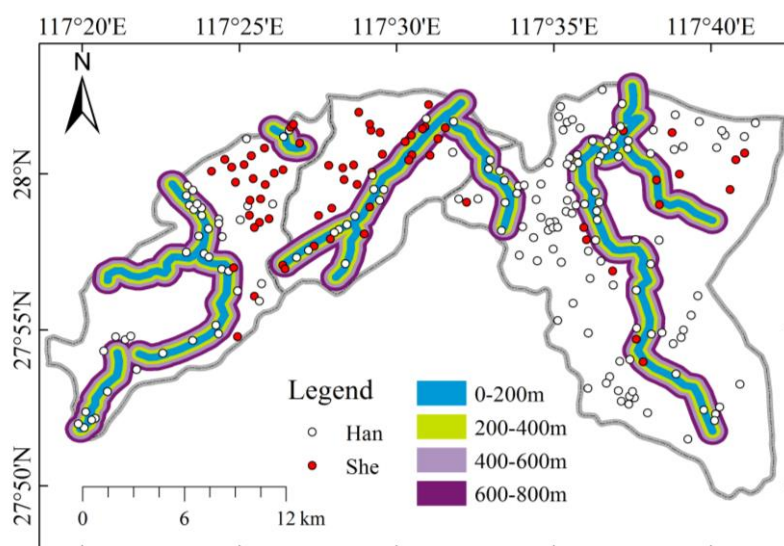

Figure S2. Human settlements in buffers of river

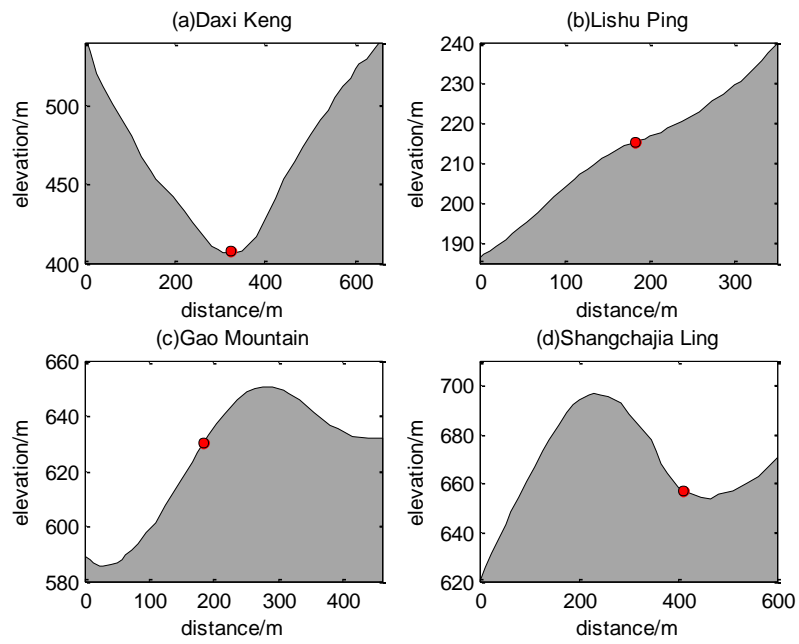

**Figure S3.** Topographic indication map of major place names (These toponymic points have the most obvious geomorphic features, so they are selected as representative sites for illustration.)
